# Supplementary material for: Role of bispectral index monitoring and burst suppression in prognostication following out-of-hospital cardiac arrest: a systematic review protocol
Source: Springer Nature journal article supplement (doi:10.1186/s13643-017-0584-6), 2017-09-25
Supplement: MOESM2 [file 15084004]

| <b>#</b> | <b>Database</b> | <b>Search term</b>                                                                                                                                   | <b>Results</b> |
|----------|-----------------|------------------------------------------------------------------------------------------------------------------------------------------------------|----------------|
| 1        | Medline         | (bispectral index).ti,ab                                                                                                                             | 2650           |
| 2        | Medline         | (BIS).ti,ab                                                                                                                                          | 80553          |
| 3        | Medline         | "MONITORING,<br>INTRAOPERATIVE"/ OR<br>"CONSCIOUSNESS<br>MONITORS"/                                                                                  | 17217          |
| 4        | Medline         | (bispectral index monitor).ti,ab                                                                                                                     | 464            |
| 5        | Medline         | (bispectral index<br>monitoring).ti,ab                                                                                                               | 865            |
| 6        | Medline         | (1 OR 2 OR 3 OR 4 OR 5)                                                                                                                              | 97669          |
| 7        | Medline         | (burst suppression).ti,ab                                                                                                                            | 2192           |
| 9        | Medline         | (prognostication).ti,ab                                                                                                                              | 5338           |
| 10       | Medline         | (prognosis).ti,ab                                                                                                                                    | 297714         |
| 11       | Medline         | PROGNOSIS/                                                                                                                                           | 420680         |
| 12       | Medline         | (9 OR 10 OR 11)                                                                                                                                      | 599993         |
| 13       | Medline         | (6 AND 12)                                                                                                                                           | 866            |
| 14       | Medline         | (7 AND 12)                                                                                                                                           | 170            |
| 15       | Medline         | (cardiac arrest).ti,ab                                                                                                                               | 29498          |
| 16       | Medline         | (cardiac arrest OR<br>cardiopulmonary arrest OR<br>circulatory arrest OR sudden<br>cardiac arrest OR SCA OR<br>sudden cardiac death OR<br>SCD).ti,ab | 44914          |
| 17       | Medline         | "HEART ARREST"/ OR "OUT-<br>OF-HOSPITAL CARDIAC<br>ARREST"/ OR "DEATH,<br>SUDDEN, CARDIAC"/                                                          | 40179          |

|    |         |                                                                                                                                       |        |
|----|---------|---------------------------------------------------------------------------------------------------------------------------------------|--------|
| 18 | Medline | (out-of-hospital cardiac arrest OR OHCA).ti,ab                                                                                        | 4366   |
| 19 | Medline | (15 OR 18)                                                                                                                            | 29557  |
| 20 | Medline | (16 OR 17 OR 19)                                                                                                                      | 82055  |
| 21 | Medline | (13 AND 20)                                                                                                                           | 17     |
| 22 | Medline | (14 AND 20)                                                                                                                           | 39     |
| 23 | EMBASE  | (bispectral index).ti,ab                                                                                                              | 3347   |
| 24 | EMBASE  | (BIS).ti,ab                                                                                                                           | 75416  |
| 25 | EMBASE  | (bispectral index monitor).ti,ab                                                                                                      | 100    |
| 26 | EMBASE  | (bispectral index monitoring).ti,ab                                                                                                   | 374    |
| 27 | EMBASE  | (burst suppression).ti,ab                                                                                                             | 1576   |
| 28 | EMBASE  | (prognostication).ti,ab                                                                                                               | 8062   |
| 29 | EMBASE  | (prognosis).ti,ab                                                                                                                     | 427109 |
| 30 | EMBASE  | (cardiac arrest).ti,ab                                                                                                                | 38295  |
| 31 | EMBASE  | (cardiac arrest OR cardiopulmonary arrest OR circulatory arrest OR sudden cardiac arrest OR SCA OR sudden cardiac death OR SCD).ti,ab | 81792  |
| 32 | EMBASE  | (out-of-hospital cardiac arrest OR OHCA).ti,ab                                                                                        | 6380   |
| 33 | EMBASE  | "BISPECTRAL INDEX"/                                                                                                                   | 3596   |
| 34 | EMBASE  | (23 OR 24 OR 33 OR 25 OR 26)                                                                                                          | 77463  |
| 35 | EMBASE  | ELECTROENCEPHALOGRAM/                                                                                                                 | 87053  |
| 36 | EMBASE  | (27 OR 35)                                                                                                                            | 87745  |

|    |        |                                              |        |
|----|--------|----------------------------------------------|--------|
| 37 | EMBASE | PROGNOSIS/ OR<br>"PROGNOSTIC<br>ASSESSMENT"/ | 506930 |
| 38 | EMBASE | (28 OR 29 OR 37)                             | 692090 |
| 39 | EMBASE | exp "HEART ARREST"/                          | 69264  |
| 40 | EMBASE | (30 OR 32)                                   | 38434  |
| 41 | EMBASE | (31 OR 39 OR 40)                             | 109823 |
| 42 | EMBASE | (34 AND 38)                                  | 277    |
| 43 | EMBASE | (36 AND 38)                                  | 3451   |
| 44 | EMBASE | (41 AND 42)                                  | 36     |
| 45 | EMBASE | (41 AND 43)                                  | 322    |
| 46 | EMBASE | (27 AND 38)                                  | 217    |
| 47 | EMBASE | (41 AND 46)                                  | 70     |
